# Supplementary material for: Functionally distinct PI 3-kinase pathways regulate myelination in the peripheral nervous system
Source: PubMed Central journal article supplement — J Cell Biol. 2014 Mar 31;204(7):1219–36. doi: 10.1083/jcb.201307057 (PMC3971744; doi:10.1083/jcb.201307057), 2014-03-31
Supplement: supp_jcb.201307057_JCB_201307057_sm.pdf [file supp_jcb.201307057_JCB_201307057_sm.pdf]

Heller et al., <http://www.jcb.org/cgi/content/full/jcb.201307057/DC1>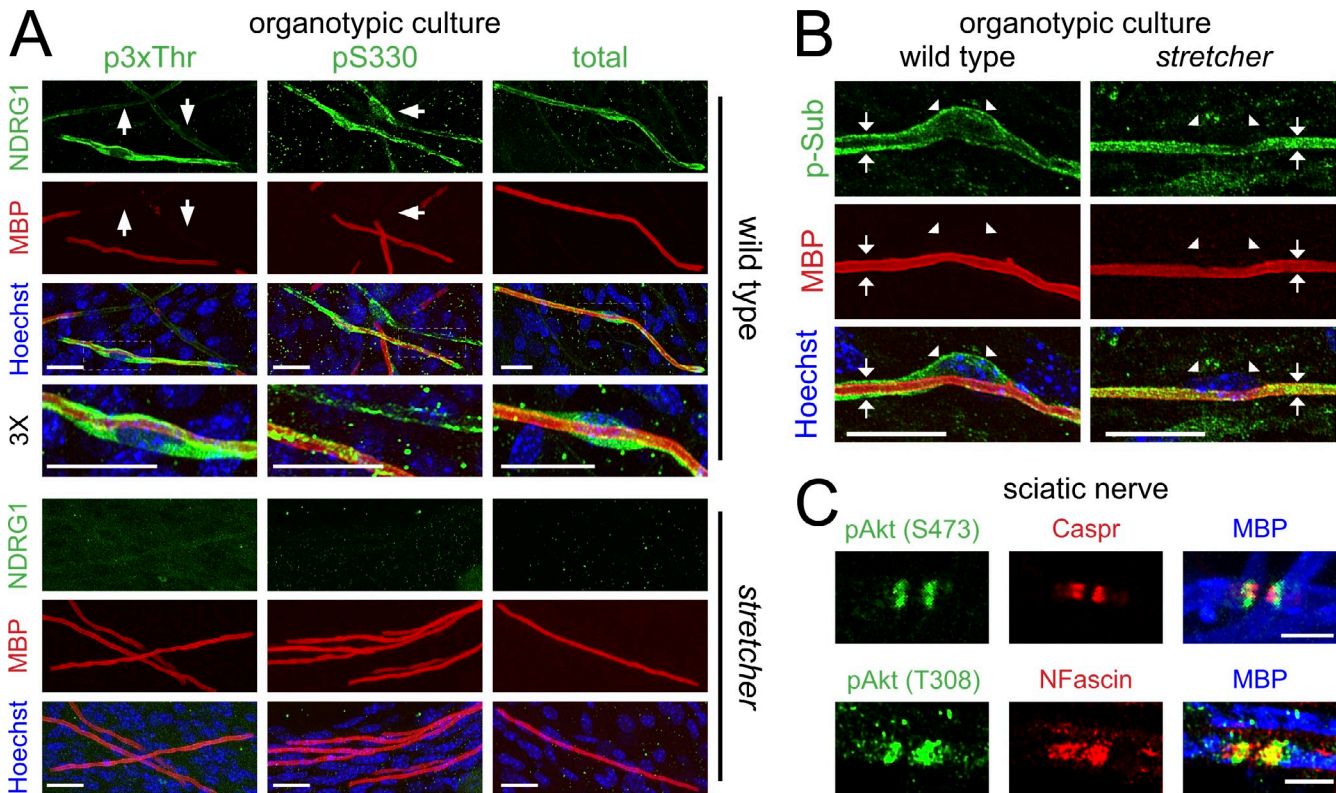

Figure S1. **Subcellular localization of phospho-substrates.** (A) Organotypic cultures obtained from wild-type (top) or *stretcher* (bottom) littermate embryos were stained for NDRG1 (green), MBP (red), and Hoechst (blue). Total and p-NDRG1 are present in all myelinated and some premyelinating Schwann cells (arrowheads). NDRG1 staining is completely abolished in the *stretcher* cultures, underscoring specificity of the staining. Bar, 20  $\mu$ m. (B) Organotypic cultures obtained from wild-type (left) or *stretcher* (right) littermate embryos were stained with p-Sub (green), MBP (red), and Hoechst (blue). Abaxonal staining (arrows) is significantly reduced in the *stretcher* mutant and completely absent around the soma (arrowheads) of myelinating Schwann cells. NDRG1 is therefore a major but not exclusive phospho-substrate detected by the p-Sub antibody in myelinating Schwann cells. Bar, 10  $\mu$ m. (C) P9 sciatic nerve stained for p-Akt (S473, green), Caspr (red), and MBP (blue) shows localized p-Akt activity in the glial paranode. The p-Akt surrounds the Caspr stain and appears in a region slightly distal to the node of Ranvier. P9 sciatic nerve (bottom) stained for p-Akt T308 exhibits a similar paranodal localization using a pan-Neurofascin antibody (red) as a marker for the glial paranode and axonal node. Bar, 5  $\mu$ m.

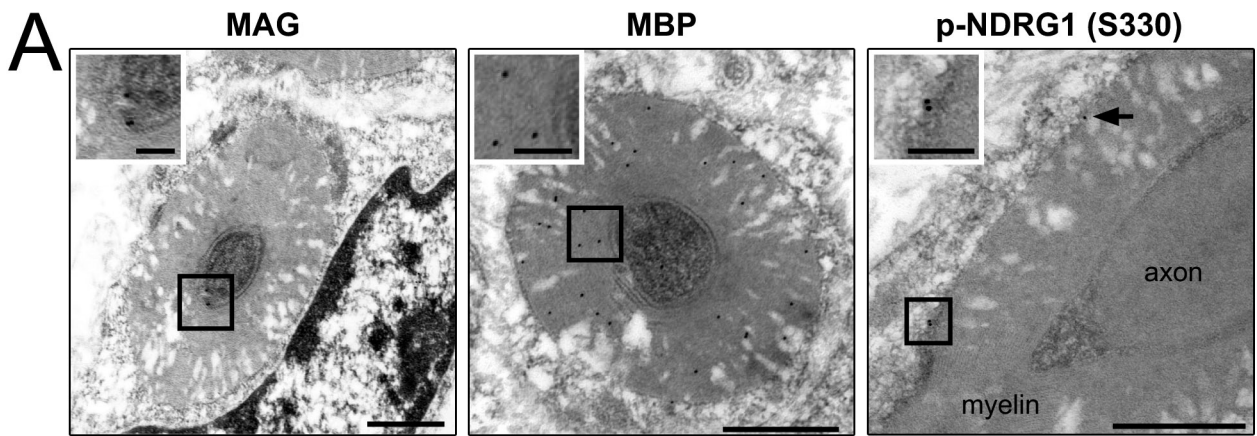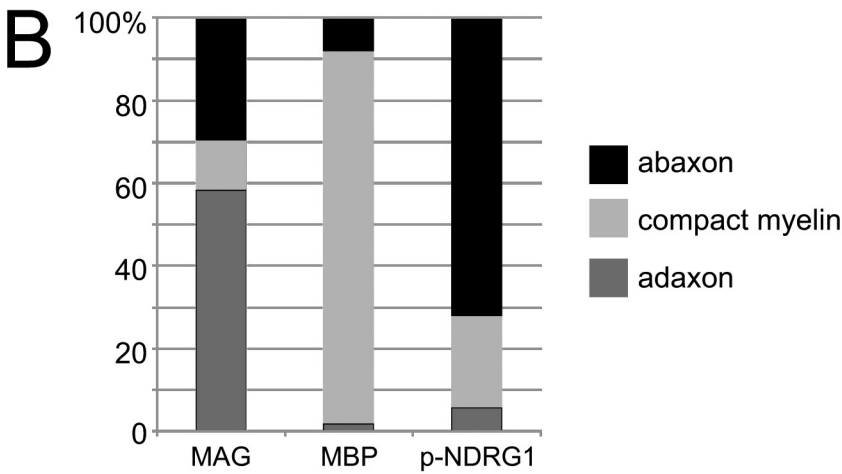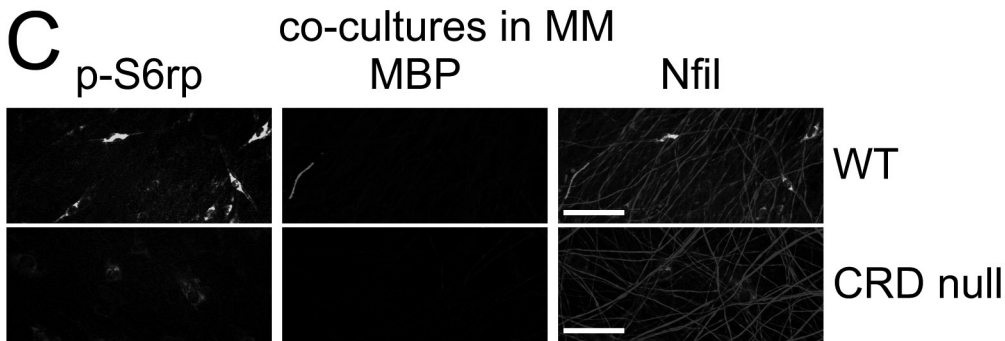

Figure S2. **p-NDRG1 is localized to the adaxon; p-S6rp staining is Neuregulin1 dependent.** (A) Localization of phospho-NDRG1 in myelinated co-cultures by immunoelectron microscopy is shown; primary antibodies were detected with gold-conjugated anti-IgG. Phosphorylated NDRG1 (S330) is enriched in the abaxon (inset and arrow). Myelin-associated glycoprotein (MAG) and MBP are enriched in the adaxon and compact myelin, respectively. Bar (main panels) 500 nm; (insets) 125 nm. (B) Percentages of gold particles in the abaxon, compact myelin, and adaxon for MAG ( $n = 206$  particles), MBP ( $n = 87$  gold particles), and p-NDRG1 S330 ( $n = 217$  particles) are shown from a single experiment. (C) Cultures of wild-type (WT) and Neuregulin1 type III-null (CRD null) mouse sensory neurons seeded with wild-type rat Schwann cells were maintained under myelinating conditions and stained for p-S6rp (green), MBP (red), and Neurofilament (Nfil, blue). Phosphorylated S6rp is only detectable in wild-type cultures. The myelin segment on the far left of the WT field does not stain for p-S6rp. Bar, 50  $\mu$ m.

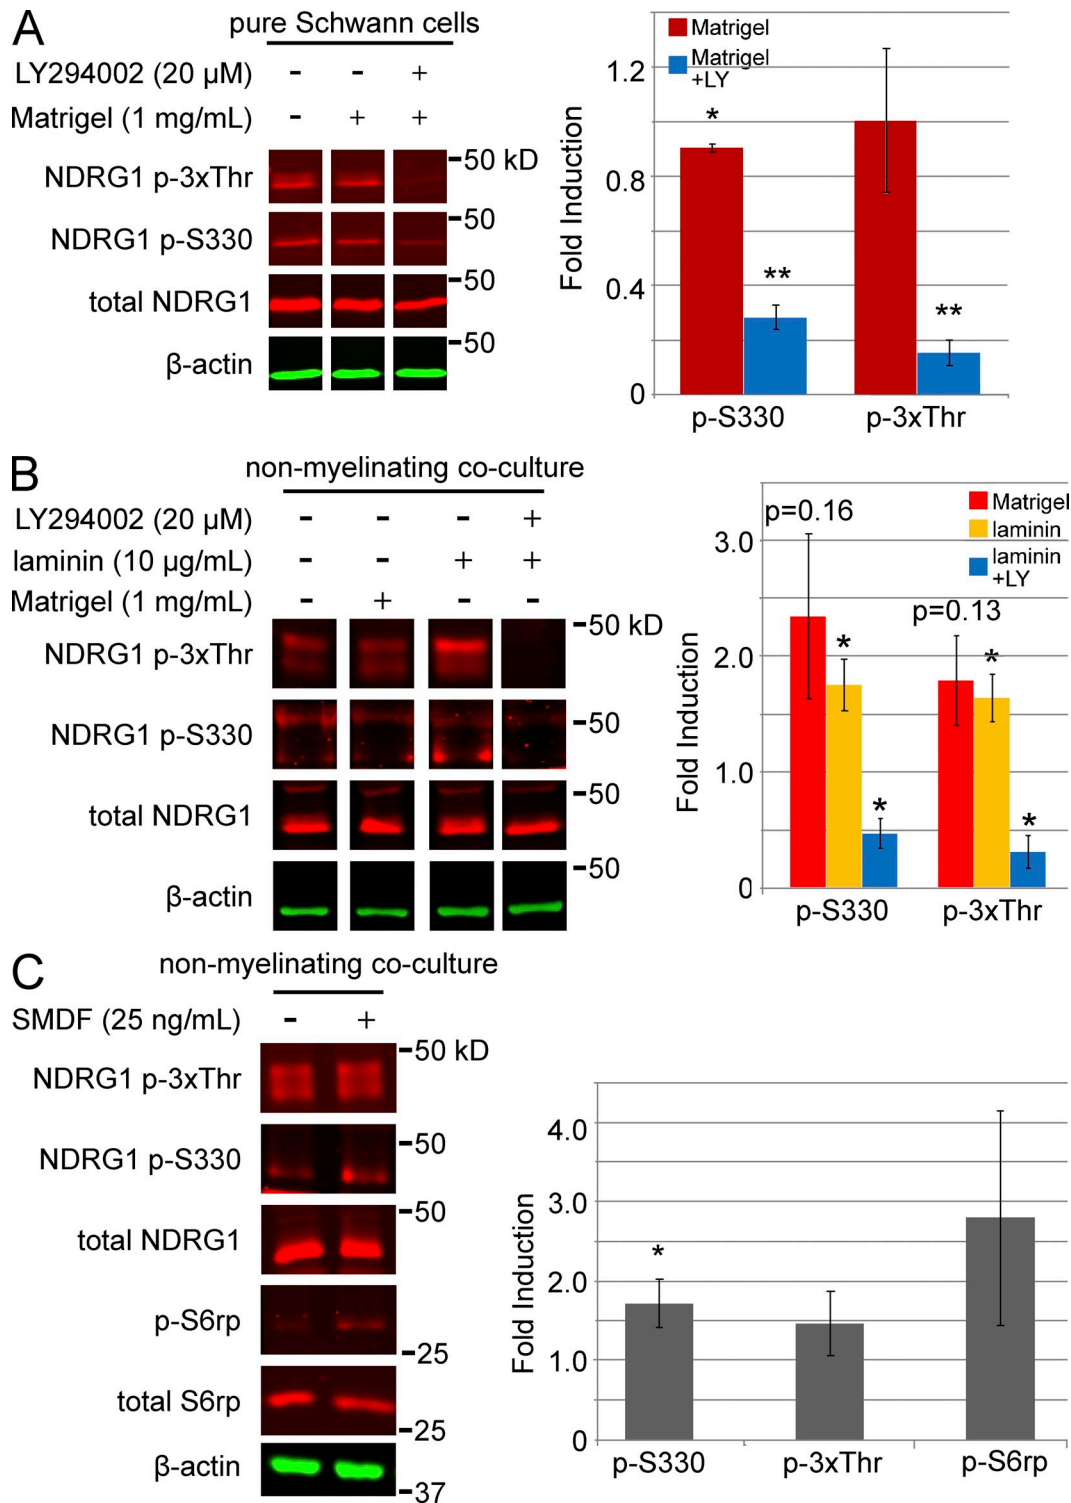

Figure S3. **Axon contact is necessary for laminin-induced NDRG1 phosphorylation.** (A) Western blotting of pure Schwann cell cultures serum starved and treated with 1 mg/ml Matrigel (for 30 min) does not induce NDRG1 phosphorylation. A small decrease in p-S330 is observed in induced conditions. 20  $\mu$ M LY294002 lowers the levels of NDRG1 phosphorylation well below baseline. p-NDRG1 is normalized to total NDRG1 for quantifications. Mean  $\pm$  SEM; \*,  $P < 0.05$ ; \*\*,  $P < 0.01$  by two-tailed Student's  $t$  test. (B) Western blotting of nonmyelinating co-cultures treated with 10  $\mu$ g/ml laminin (for 30 min) or 1 mg/ml Matrigel (for 30 min) in the presence or absence of 20  $\mu$ M LY294002. NDRG1 phosphorylation is induced by laminin; this induction is blocked by the LY inhibitor. p-NDRG1 is normalized to total NDRG1 for quantifications. Mean  $\pm$  SEM; \*,  $P < 0.05$ ; \*\*,  $P < 0.01$  by two-tailed Student's  $t$  test ( $n = 4$ ). (C) Western blotting of nonmyelinating co-cultures treated with soluble Neuregulin1 type III, or SMDF (25 ng/ml, 30 min). Both NDRG1 and S6rp phosphorylation are induced by Neuregulin1. Phosphorylated protein is normalized to total protein for quantifications. Mean  $\pm$  SEM; \*,  $P < 0.05$  by two-tailed Student's  $t$  test ( $n = 4$ ).

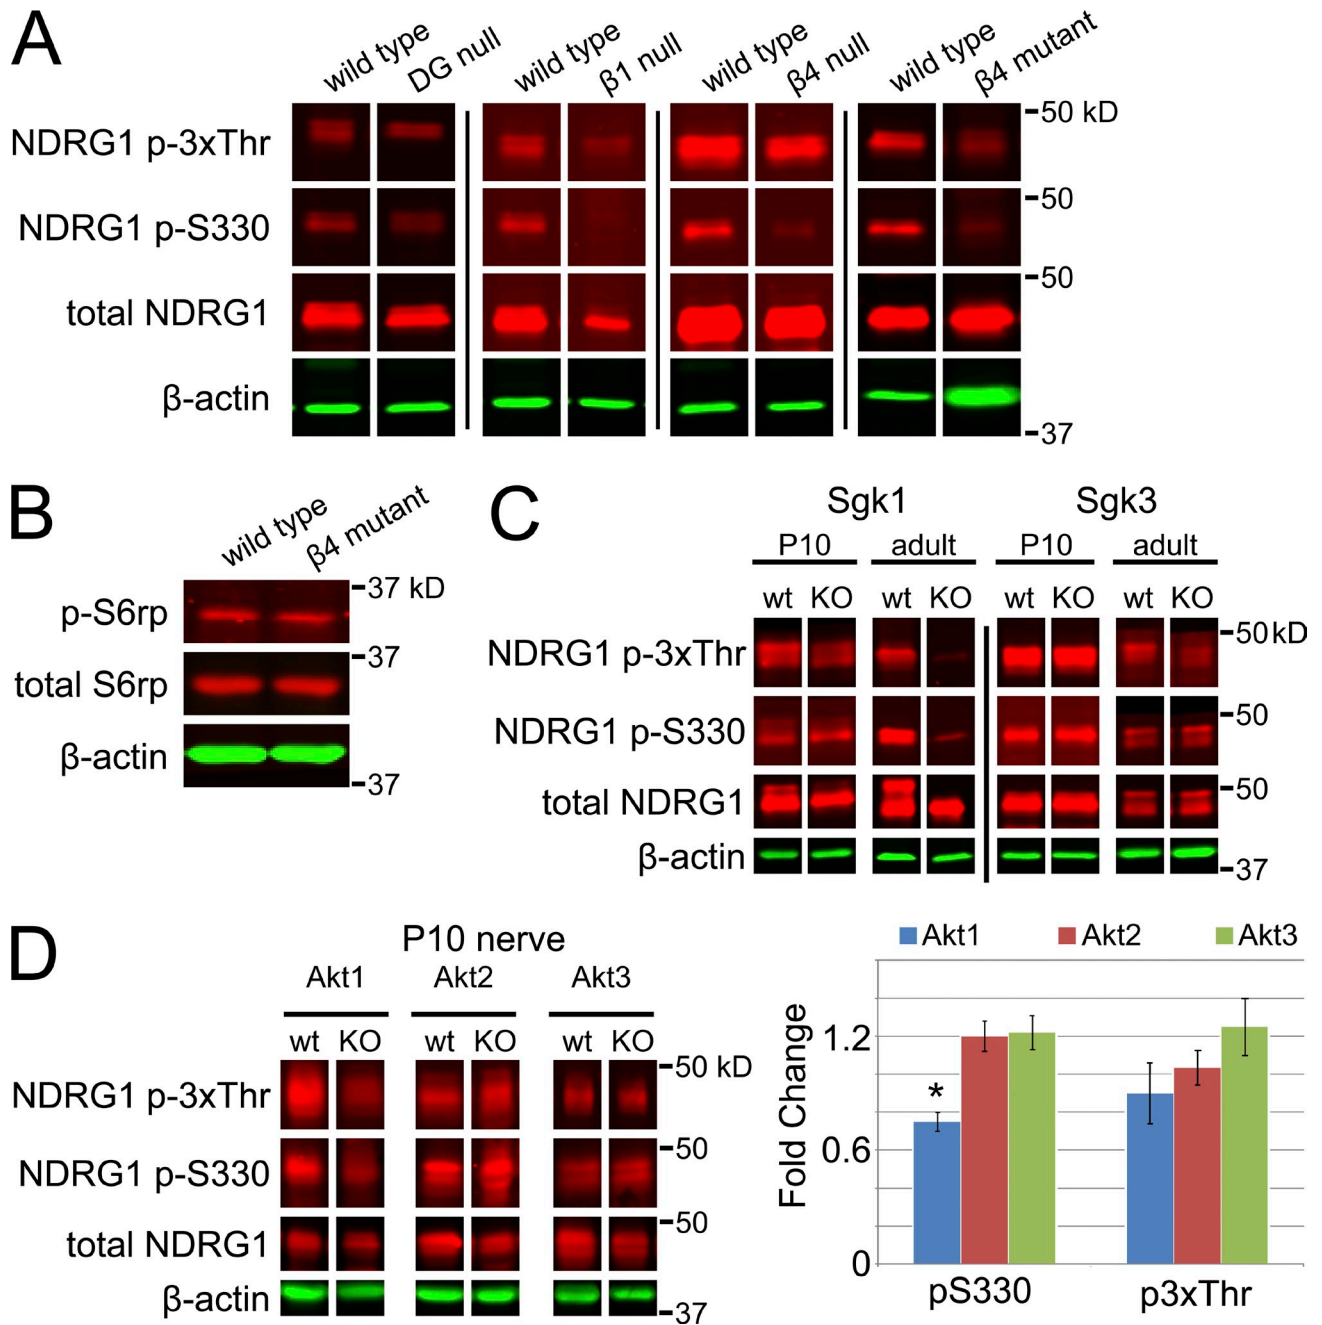

Figure S4. **Akt1, Sgk1, and β4 integrin are required for proper NDRG1 phosphorylation at P10.** (A) Western blotting data for Fig. 7 A. (B) Western blotting data for Fig. 7 B. (C) Western blotting data for Fig. 8 . (D) Western blots and quantifications of P10 sciatic nerve from isoform-specific knockouts of Akt1, Akt2, and Akt3. Akt1 loss affects p-Ser330 only; loss of other isoforms does not cause a defect in NDRG1 phosphorylation. p-NDRG1 is normalized to total NDRG1 for quantification. Mean ± SEM,  $n \geq 3$ ; \*,  $P < 0.05$  by two-tailed Student's  $t$  test.

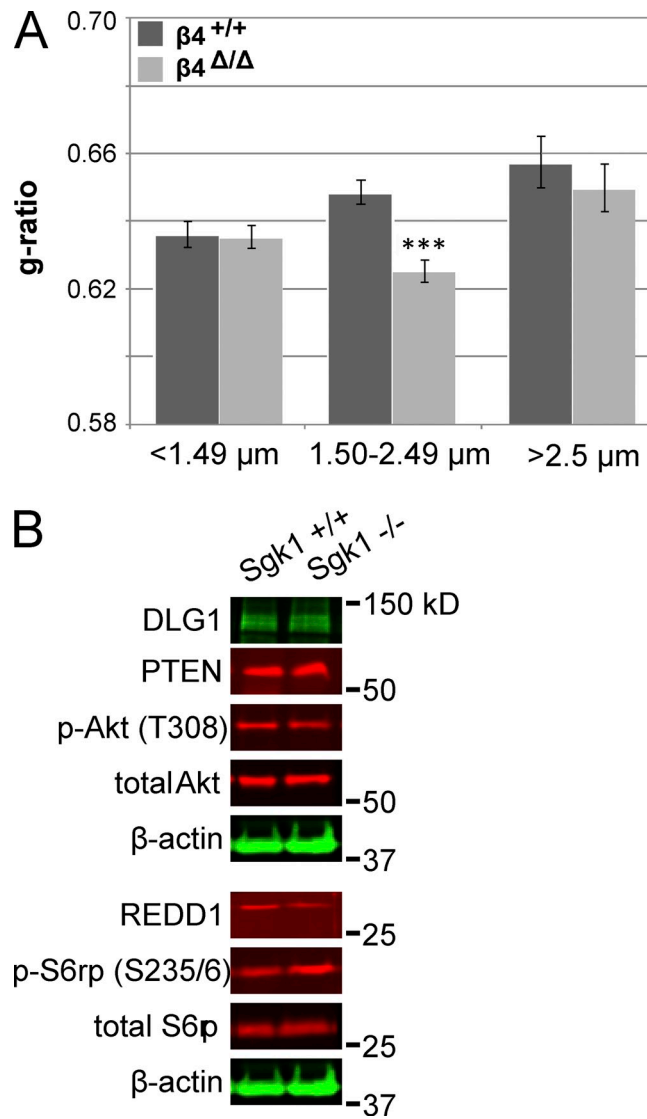

Figure S5. **Analysis of the  $\beta 4$ -signaling mutant and *Sgk1*-null mice.** (A) Quantification of the g-ratios in P10 sciatic nerves from wild-type and  $\beta 4$  mutant mice shown in Fig. 9 D. The loss of  $\beta 4$  integrin signaling results in a modest hypermyelination, particularly for smaller-caliber axons. An entire cross section of proximal nerve was quantified from two wild-type (875 axons total) and two  $\beta 4$  mutant mice (892 axons total). Mean g-ratios are shown  $\pm$  SEM; \*\*\*,  $P < 0.001$  by ANOVA. (B) Lysates from P10 *Sgk1*<sup>+/+</sup> and *Sgk1*<sup>-/-</sup> nerves were analyzed for levels of PTEN, DLG1, total and p-Akt (T308), REDD1, and total and p-S6rp (S235/6). There is no change in PTEN, DLG, or Akt levels; however, REDD1 decreases and p-S6rp increases but the difference is not statistically significant;  $P > 0.05$  ( $n = 4$ ) by two-tailed Student's *t* test.
